# Supplementary material
Source: PubMed Central journal article supplement (PMC6182266)
Supplement: blood853929-suppl1.pdf [file blood853929-suppl1.pdf]

**Supplementary Figure 1:** Longitudinal estimated glomerular filtration rates (eGFR) in sickle cell anemia patients that developed an acute kidney injury event. The dark blue line and dashed red line represent the linear and locally weighted scatterplot smoothing eGFR slope, respectively.

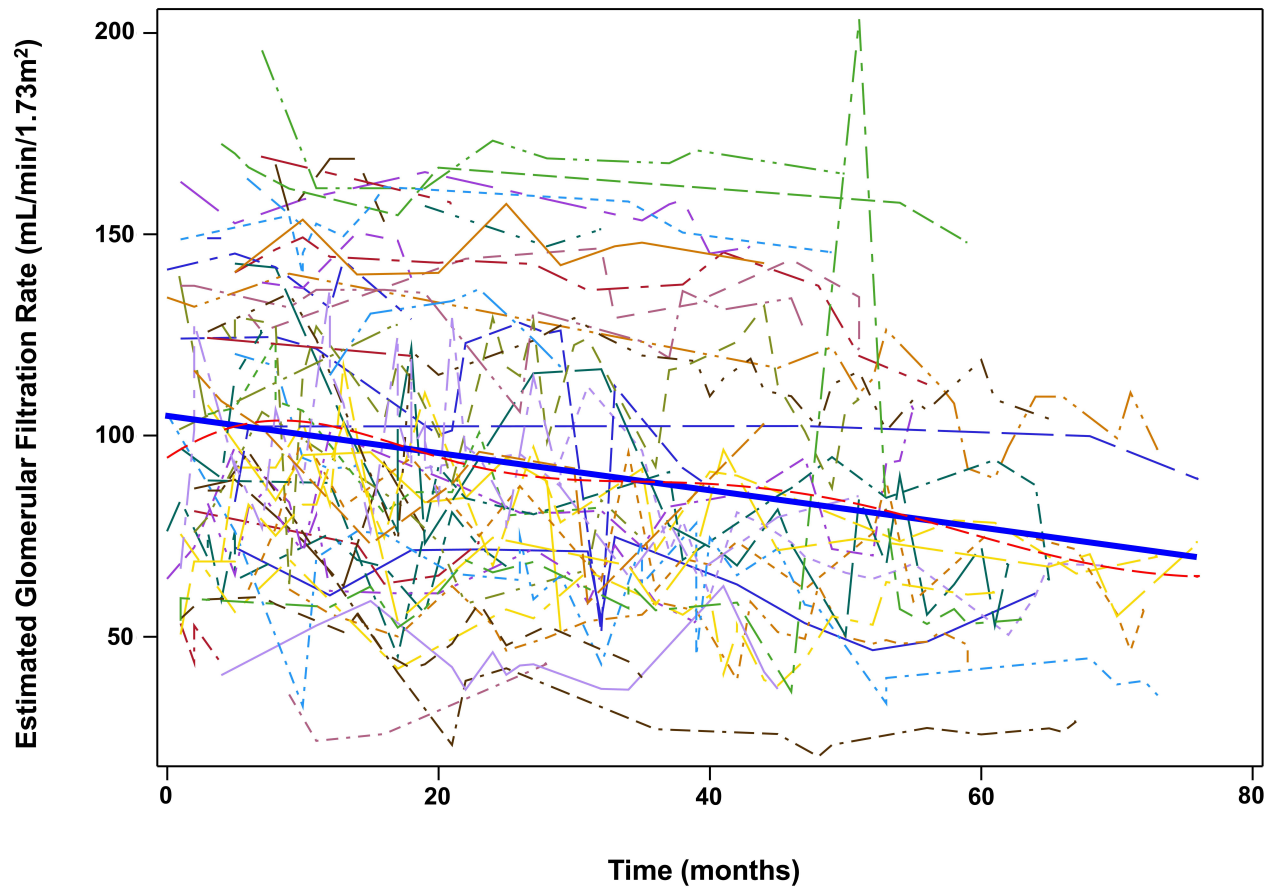

| <b>Supplementary Table 1.</b> Clinical settings for acute kidney injury events in 63 hospitalized sickle cell anemia patients. |                           |                         |
|--------------------------------------------------------------------------------------------------------------------------------|---------------------------|-------------------------|
| <b>Clinical Setting</b>                                                                                                        | <b># Hospitalizations</b> | <b># AKI events (%)</b> |
| Heart failure exacerbation                                                                                                     | 32                        | 8 (25%)                 |
| Acute chest syndrome                                                                                                           | 210                       | 35 (17%)                |
| Intrahepatic cholestasis                                                                                                       | 20                        | 3 (15%)                 |
| Documented infection                                                                                                           | 185                       | 15 (8%)                 |
| Surgical procedure                                                                                                             | 86                        | 4 (5%)                  |
| VOC with increased hemolysis <sup>1</sup>                                                                                      | 498                       | 20 (4%)                 |
| VOC without increased hemolysis <sup>1</sup> or pre-renal azotemia <sup>2</sup>                                                | 1660                      | 26 (1.6%)               |
| VOC with pre-renal azotemia <sup>2</sup>                                                                                       |                           | 24 (1.4%)               |
| <b>Total</b>                                                                                                                   | <b>2691</b>               | <b>135 (5%)</b>         |

<sup>1</sup>Defined by LDH or indirect bilirubin > 1.5 times steady-state; <sup>2</sup>Pre-renal azotemia defined as BUN:creatinine ratio > 20 or FENa < 1%  
VOC, vaso-occlusive crisis; AKI, acute kidney injury
